# Supplementary material for: Genetic Variation in the Staphylococcus aureus 8325 Strain Lineage Revealed by Whole-Genome Sequencing
Source: PubMed Central journal article supplement (PMC3786944; doi:10.1371/journal.pone.0077122), 2013-09-30
Supplement: pone.0077122.s003.pdf [file pone.0077122.s003.pdf]

**Table S1. Oligonucleotide PCR primers used for SNP and indel analysis**

| Primer         | Sequence 5'-3'              | Primer         | Sequence 5'-3'              |
|----------------|-----------------------------|----------------|-----------------------------|
| 22181F         | TGATTACTATAACCGTGGCGGCG     | 292840F        | GATTATATAGATTGGATAAATACAG   |
| 22181R         | TCCTTTTCCTTCGTCTCCCATTG     | 292840R        | CATGTTATCTCCCCTATATTTTCAGC  |
| 2689048F       | TATGTTCCATTACTCACAATACGC    | 392716F        | ATCACAAAGAGTAATAGTAAAAAAG   |
| 2689048R       | AAATGTAATTGCTGGTAACACAGG    | 392716R        | GTTTGATGCAATGACGTTATGTTC    |
| 2762204F       | CACCTGTACTTTCTGATGTTGAGCC   | 405366F        | CTCCTCTAAAAATTGTAACCTCCATC  |
| 2762204R       | GAGAATCCACATCGACATCAACGTC   | 405366R        | TCCACCTTGTATTACTTTTGGCG     |
| 110019F        | GTTGATACAGACACTTTAACTGG     | 412760/65F     | ATAAATCAACACAAAGCAAAGCCAC   |
| 110019R        | GGATAAAAAATTCGTTGCATATGAGC  | 412760/65R     | GTACAGTTAGGCAGTATTTCCCGTC   |
| 751285F        | AGAATGTACAATAAACTTGCGGG     | 448755/71F     | GATAAGGGCGTTCAGTACAGATGAC   |
| 751285R        | CAGAACGACCACGTAACCTGGTCATC  | 448755/71R     | CGATCACCTCTCAGGTCGGCTATG    |
| 1020577F       | AAAATGATTAAGCATAAGATAACAGG  | 453801F        | AGCTATGTGTGGACGGGATAAGTGC   |
| 1020577R       | AAATCATTAACAATAACGGCATTCTC  | 453801R        | TCTACTCTAGCGGAACGTAAGTTGG   |
| 2106539F       | TTACATTGAAAAAGTTGAGGAAGCGG  | 649126F        | ACACCATTAATTCAAATGAATCAAGC  |
| 2106539R       | CTGTGGATAGCTATAATATCAGCG    | 649126R        | GGATTTAACGGTAATTCATTACTCGG  |
| 1009713F       | AGAGAAGGAGTCGAAGTAAGCC      | 653552/3801F   | GGTATTAGTAAAAAGATATGCCGC    |
| 1009713R       | GGAATAACAACCTTTAGACCTGGAG   | 653552/3801R   | ATAATAGCAATAAACTCGCCTTCTTC  |
| 1123048F       | ACGACACCGGAAGAAGCAAGACAGC   | 653552/3801F2  | TTACGTGTCACTTAAACGCATGGTC   |
| 1123048R       | GCTGTGACTGAAGATCCCCTGTGCG   | 827849F        | GGTCTATCGTAGGCATTGGAGGCGG   |
| 2733480F       | GACCACCGTAGTTATTAACATGCG    | 827849R        | TCACTTTGACACCGATTTTCGCACC   |
| 2733480R       | GACATTAAGTAAAGATGACGCAGCCGA | 841103/39F     | ACATTGTGGTATATGTTAGCCGGG    |
| Indel75276F    | AGGAAGTAAAAGGCTTAAAACCGC    | 841103/39R     | TGATTTTCGATTAATAAATGTATCCGC |
| Indel75276R    | TTTTAATTCATATGGATGACGCGCAG  | AgrF2          | CAGTTAAGTATTTATTTCTACAG     |
| 47652F         | AAGTAATTCAATATAAAAAACAGGTG  | AgrR2          | CGCCATAGGATTGTAGAGTG        |
| 47652R         | ATAATGTATTTCTTCTTTTGGATGG   | AgrA F1        | TTTAGAACTGCACATACACG        |
| 1653482F       | CCGAACAATGCTTGATCTTCAG      | 2244414/67/95F | CGAAGTTATCCAGTCTTATAGGT     |
| 1653482R       | ATATGCCTGCAGTAACATACGA      | 2244414/67/95R | GTTCTTGTGTTAAGCAATAAACG     |
| 2318272/74/90F | GGATGATTGTGTAACCTGATTTCTC   | 2383630/60F    | ACATACAACCTCAGCTATTCTTGG    |
| 2318272/74/90R | CATTCACCACCGTTCTTATGAC      | 2383630/60R    | GATTTTCATAGCACGGTAGTTGG     |
| 939304F        | TTTATTATAATCTATTGGTTGGTCCG  | 954590F        | GCGTAAGGGAAGTAGTTATCAG      |
| 939304R        | ATATTTATGTGATACGCAAAGGAG    | 954590R        | AATTCTGTTGCATTCAAATCAGG     |
| 1016979F       | TGATTATCGTCTTACCACAACCTG    | 1358230F       | AAATCACCATATTGTGCTTCCC      |
| 1016979R       | TAAAGTAAGACAAAGCATACCCAC    | 1358230R       | GCATTCATTTATAGAACAAGTCCA    |
| 2272936F       | AAGCAGTGATGATATCTTTAGTTACC  | 2678563F       | TTACACATTTCTATGGAACGCT      |
| 2272936R       | TTTGAGACTCAAGAACGTTATCC     | 2678563R       | GGAAAGAGAAGCAATCAGACCT      |
| D63bpF         | ATTTATTCAGGAAGTAAAAGGC      | D1200bpF       | AGAACGATGAAAAGAATTACGAG     |
| D63bpR         | AAGTGTGCTGTATTCTAAAGTGC     | D1200bpR       | GGCGTTGCAGATACATACAC        |
