# Supplementary material for: Genetic Variation in the Staphylococcus aureus 8325 Strain Lineage Revealed by Whole-Genome Sequencing
Source: PubMed Central journal article supplement (PMC3786944; doi:10.1371/journal.pone.0077122), 2013-09-30
Supplement: pone.0077122.s005.pdf [file pone.0077122.s005.pdf]

**Table S3: Oligonucleotide q-RT PCR primers**

| <b>Primer</b> | <b>Sequence 5' -3'</b>        |
|---------------|-------------------------------|
| sarS-F        | CACCATAAATACCCTCAAACCTGTTAGAG |
| sarS-R        | TCATCTTCAGTTGAGCGTTCTTTT      |
| sarS-P        | AAAAAGCAAGGCTATCTAA           |
| spa-F         | CAGCAAACCATGCAGATGCTAA        |
| spa-R         | ACAGTTGTACCGATGAATGGATTTT     |
| spa-P         | AGCATTACCAGAAACT              |
| 16S-F         | GATAGAGCCTTCCCCTTCGG          |
| 16S-R         | CCGGCAGTCAACTTAGAGTGC         |
| 16S-P         | ACATCTCACGACACGAGCTGACGACA    |
